# Supplementary material
Source: PubMed Central journal article supplement (PMC5009369)
Supplement: NIHMS308616-supplement-Supplement.pdf [file NIHMS308616-supplement-Supplement.pdf]

**Table I: Top five nodes in each protein by degree and closeness**

Degree and closeness are given in parentheses for each residue.

| <b>Protein</b>         | <b>Top 5 Nodes by</b> |            |            |            |            |            |
|------------------------|-----------------------|------------|------------|------------|------------|------------|
| anthranilate synthase  | degree                | L136(12)   | S135(10)   | H134(9)    | H107(8)    | R257(8)    |
|                        | closeness             | G485(0.20) | K357(0.20) | K502(0.20) | D489(0.19) | R469(0.19) |
| ATCase                 | degree                | T79(11)    | Y240(9)    | R41(8)     | A245(7)    | S238(7)    |
|                        | closeness             | E10(0.30)  | V9(0.28)   | A11(0.28)  | R41(0.27)  | D4(0.26)   |
| ATP sulfurylase        | degree                | L229(8)    | R572(6)    | M332(6)    | T230(6)    | Q331(6)    |
|                        | closeness             | R515(1.0)  | D111(0.66) | F330(0.21) | A213(0.20) | M332(0.20) |
| ATP-PRT                | degree                | R184(8)    | I55(7)     | S59(6)     | R160(6)    | E61(5)     |
|                        | closeness             | Q164(0.17) | K32(0.17)  | R160(0.17) | D33(0.17)  | D30(0.16)  |
| DAHP synthase          | degree                | K97(8)     | K105(7)    | E96(6)     | C61(3)     | D326(3)    |
|                        | closeness             | K105(0.46) | K97(0.41)  | Q170(0.38) | E96(0.37)  | R99(0.34)  |
| FBPase-1               | degree                | Y57 (12)   | A51(12)    | K71(11)    | I59(10)    | A54(9)     |
|                        | closeness             | M18(0.11)  | R15(0.11)  | Q32(0.11)  | S88(0.11)  | A60(0.11)  |
| glcN-6-P deaminase     | degree                | E148(7)    | L153(5)    | K160(5)    | S151(5)    | T225(5)    |
|                        | closeness             | K208(0.5)  | T41(0.5)   | G43(0.42)  | F173(0.42) | G42(0.42)  |
| GTP cyclo-hydrolase I  | degree                | V209(9)    | K230(8)    | E119(7)    | Q210(7)    | R226(6)    |
|                        | closeness             | K230(0.09) | E233(0.08) | R226(0.08) | P229(0.08) | R232(0.08) |
| glycogen phosphorylase | degree                | R269(10)   | Y262(10)   | F252(9)    | V266(8)    | L254(7)    |
|                        | closeness             | Y75(0.32)  | S314(0.29) | R310(0.28) | D42(0.26)  | G317(0.26) |
| lactate DH             | degree                | T236(10)   | P60(9)     | R156(8)    | I229(8)    | I230(8)    |
|                        | closeness             | K170(0.10) | P60(0.10)  | H54(0.10)  | F159(0.10) | I229(0.10) |
| NAD-malic enzyme       | degree                | Y112(9)    | N421(6)    | F68(6)     | E314(5)    | N467(5)    |
|                        | closeness             | N421(0.41) | N467(0.41) | L167(0.41) | N466(0.41) | D279(0.39) |
| phosphofructokinase    | degree                | A157(14)   | H160(11)   | T158(10)   | R162(10)   | S159(9)    |
|                        | closeness             | A157(0.43) | T158(0.41) | K214(0.41) | R162(0.41) | H160(0.40) |
| phosphoglycerate DH    | degree                | L142(5)    | Q298(3)    | R60(3)     | A143(3)    | K141(3)    |
|                        | closeness             | G18(0.54)  | H292(0.4)  | P212(0.4)  | A238(0.4)  | S216(0.38) |
| PTB1B                  | degree                | W291(10)   | F182(6)    | S295(6)    | N193(6)    | E297(6)    |
|                        | closeness             | F182(0.48) | R221(0.43) | Q262(0.41) | D181(0.40) | N193(0.37) |
| uracil PRT             | degree                | R80(11)    | P114(9)    | L79(8)     | F215(7)    | Y123 (5)   |
|                        | closeness             | E87(0.18)  | R37(0.17)  | Q98(0.17)  | V83(0.17)  | R97(0.16)  |

**Table II: list of allostery-altering mutations for three proteins**

## 1) phosphofructokinase (PFK)

In WT, GDP counters PEP inhibition but has no effect by itself.

| ref | mutation                    | effect                                                                                      |
|-----|-----------------------------|---------------------------------------------------------------------------------------------|
| [1] | D59A, D59M<br>R25A, D211A   | mild decrease in PEP inhib<br>severe reduction (~100fold) of PEP inhib                      |
| [2] | R252A                       | large increase in PEP inhib                                                                 |
| [3] | G212V                       | 3x weaker PEP inhib than WT<br>insensitive to GDP activation                                |
| [4] | E161Q<br>E161A              | ~10x weaker PEP inhib, ~6x stronger GDP act.<br>~2x weaker PEP inhib, ~4x stronger GDP act. |
| [5] | E161A<br>R162A, E161A+R162A | coupling $\Delta G$ (PEP-fru6P) similar to WT<br>coupling $\Delta G$ ~2/3 of WT             |

Summary of key positions (those used for testing of allosteric networks):

reduce PEP inhib: E161Q (A), R162A, G212V, R25A, D211A

increase PEP inhib: R252A

## 2) fructose bisphosphatase (FBPase)

| ref  | mutation                           | effect                                                                                          |
|------|------------------------------------|-------------------------------------------------------------------------------------------------|
| [6]  | R140A, T31S<br>A24F<br>T31A, Y113F | <10-fold -AMP inhib<br>10-100-fold -AMP inhib<br>>1000-fold -AMP inhib                          |
| [7]  | R22A                               | 10-fold -AMP inhib                                                                              |
| [8]  | E98Q                               | abolish coop of AMP inhib                                                                       |
| [9]  | R22K<br>N9D<br>T27A, M18R          | 10-100 fold -AMP inhib<br><10-fold -AMP inhib<br>>1000-fold -AMP inhib                          |
| [10] | K42A                               | >1000-fold AMP required for full inhib<br>cooperative AMP inhib disrupted                       |
| [11] | D187A<br>E92Q, E92A                | <10-fold -AMP inhib<br>>100-fold AMP required for full inhib<br>cooperative AMP inhib disrupted |
| [12] | K71A<br>K71M+K72M<br>D74E, N64A    | ~10-fold -AMP inhib<br>~150-fold -AMP inhib<br>abolish AMP cooperativity                        |
| [13] | K50A, K50Q<br>R49A, R49Q           | abolish AMP cooperativity<br>abolish AMP cooperativity +<br>>1000-fold -AMP inhib               |
| [14] | Y57W<br>A51P<br>K50P               | <10-fold -AMP inhib<br>100-1000-fold -AMP inhib<br>>1000-fold -AMP inhib                        |
| [15] | K112Q, Y113F                       | >1000-fold -AMP inhib                                                                           |

key mutants: A24, T31, Y113, R22, T27, M18, K42, E92, K72, R49, A51, K50, K112  
 weak or unclear mutants: R140, E98, N9, D187, K71, D74, N64, Y57

### 3) Aspartate transcarbamoylase (ATCase)

| ref  | mutation                                                  | effect                                                                                                            |
|------|-----------------------------------------------------------|-------------------------------------------------------------------------------------------------------------------|
| [16] | R-K94Q                                                    | no ATP activation<br>weakened CTP inhib                                                                           |
| [17] | C-Q108Y, R-N113G                                          | slight alteration in ATP activation<br>slight (~1.5) weakening of CTP inhib                                       |
| [18] | R-N111A                                                   | no ATP act or CTP inhib                                                                                           |
| [19] | R-K56A                                                    | no ATP act, weakened CTP inhib                                                                                    |
| [20] | C-E50[A or D]                                             | weakened ATP act & CTP inhib                                                                                      |
| [21] | C-Q231L<br>C-R167Q                                        | weakened ATP act & CTP inhib<br>no effect on ATP or CTP                                                           |
| [22] | C-(K164E, E239K)                                          | no discernible ATP act or CTP inhib                                                                               |
| [23] | R-Y77F                                                    | ATP activation -> inhibition!                                                                                     |
| [24] | R-K60H<br>K60R/Q<br>K60A<br>R-K94H                        | no discernible ATP act or CTP inhib<br>no effect<br>lost CTP inhib<br>very slight weakening of ATP act, CTP inhib |
| [25] | C-D160A                                                   | no discernible ATP act or CTP inhib                                                                               |
| [26] | R-(C109H, E119D)                                          | lost CTP inhib (pH 7)                                                                                             |
| [27] | R-(V106W, L76A, L151Q)                                    | weakened ATP act                                                                                                  |
| [28] | R-(F145W, S146E, S146A,<br>N148D, N148A, V149A,<br>N153G) | weaken or abolish ATP act                                                                                         |
| [29] | C-E50A<br>C-S171A                                         | weaken ATP act<br>weaken CTP inhib                                                                                |
| [30] | R-E162A<br>R-I12A                                         | strengthen ATP act, CTP inhib<br>weaken CTP inhib, no ATP act                                                     |
| [31] | R-V106L<br>R-D104G<br>I103T                               | weakened ATP act & CTP inhib<br>lost ATP act<br>ATP act -> inhib                                                  |
| [32] | R-T82A                                                    | stronger ATP act, weaker CTP inhib                                                                                |
| [33] | C-D162A                                                   | weaken ATP act                                                                                                    |
| [34] | C-D236A                                                   | no ATP act or CTP inhib                                                                                           |

summary of mutants with significant effects:

catalytic chain (A, C, ...): Q108, E50, Q231, K164, E239, D160, S171, D162, D236  
 regulatory chain (B, D, ...): K94, N113, N111, K56, Y77, K60, C109, E119, V106, L76,  
 L151, F145, S146, N148, V149, N153, E162, I12, D104, I103, T82

## References for Table II:

1. Valdez, B.C., S.H. Chang, and E.S. Younathan, *Site-directed mutagenesis at the regulatory site of fructose 6-phosphate-1-kinase from Bacillus stearothermophilus*. Biochem Biophys Res Commun, 1988. **156**(1): p. 537-42.
2. Valdez, B.C., et al., *Site-directed mutagenesis in Bacillus stearothermophilus fructose-6-phosphate 1-kinase. Mutation at the substrate-binding site affects allosteric behavior*. J Biol Chem, 1989. **264**(1): p. 131-5.
3. Zhu, X., et al., *Role of glycine 212 in the allosteric behavior of phosphofructokinase from Bacillus stearothermophilus*. Biochemistry, 1995. **34**(8): p. 2560-5.
4. Auzat, I., et al., *Role of residue 161 in the allosteric transitions of two bacterial phosphofructokinases*. Biochemistry, 1995. **34**(21): p. 7062-8.
5. Kimmel, J.L. and G.D. Reinhart, *Reevaluation of the accepted allosteric mechanism of phosphofructokinase from Bacillus stearothermophilus*. Proc Natl Acad Sci U S A, 2000. **97**(8): p. 3844-9.
6. Gidh-Jain, M., et al., *The allosteric site of human liver fructose-1,6-bisphosphatase. Analysis of six AMP site mutants based on the crystal structure*. J Biol Chem, 1994. **269**(44): p. 27732-8.
7. Lu, G., et al., *Fructose-1,6-bisphosphatase: arginine-22 is involved in stabilization of the T allosteric state*. Biochemistry, 1995. **34**(41): p. 13272-7.
8. Kelley, N., et al., *Glutamic acid residue 98 is critical for catalysis in pig kidney fructose-1,6-bisphosphatase*. Biochem Biophys Res Commun, 1996. **219**(3): p. 848-52.
9. Shyur, L.F., A.E. Aleshin, and H.J. Fromm, *A study of subunit interface residues of fructose-1,6-bisphosphatase by site-directed mutagenesis: effects on AMP and Mg<sup>2+</sup> affinities*. Biochemistry, 1996. **35**(23): p. 7492-8.
10. Lu, G., et al., *Evidence for an active T-state pig kidney fructose 1,6-bisphosphatase: interface residue Lys-42 is important for allosteric inhibition and AMP cooperativity*. Protein Sci, 1996. **5**(11): p. 2333-42.
11. Lu, G., E.L. Giroux, and E.R. Kantrowitz, *Importance of the dimer-dimer interface for allosteric signal transduction and AMP cooperativity of pig kidney fructose-1,6-bisphosphatase. Site-specific mutagenesis studies of Glu-192 and Asp-187 residues on the 190's loop*. J Biol Chem, 1997. **272**(8): p. 5076-81.
12. Kurbanov, F.T., et al., *Directed mutations in the poorly defined region of porcine liver fructose-1,6-bisphosphatase significantly affect catalysis and the mechanism of AMP inhibition*. J Biol Chem, 1998. **273**(28): p. 17511-6.
13. Carcamo, J.G., et al., *The C1-C2 interface residue lysine 50 of pig kidney fructose-1, 6-bisphosphatase has a crucial role in the cooperative signal transmission of the AMP inhibition*. Eur J Biochem, 2000. **267**(8): p. 2242-51.
14. Nelson, S.W., et al., *Mutations in the hinge of a dynamic loop broadly influence functional properties of fructose-1,6-bisphosphatase*. J Biol Chem, 2000. **275**(39): p. 29986-92.
15. Kelley-Loughnane, N. and E.R. Kantrowitz, *AMP inhibition of pig kidney fructose-1,6-bisphosphatase*. Biochim Biophys Acta, 2001. **1548**(1): p. 66-71.

16. Zhang, Y., M.M. Ladjimi, and E.R. Kantrowitz, *Site-directed mutagenesis of a residue located in the regulatory site of Escherichia coli aspartate transcarbamoylase. Involvement of lysine 94 in effector binding and the allosteric mechanism.* J Biol Chem, 1988. **263**(3): p. 1320-4.
17. Xu, W., et al., *Propagation of allosteric changes through the catalytic-regulatory interface of Escherichia coli aspartate transcarbamoylase.* Biochemistry, 1988. **27**(15): p. 5507-15.
18. Eisenstein, E., D.W. Markby, and H.K. Schachman, *Changes in stability and allosteric properties of aspartate transcarbamoylase resulting from amino acid substitutions in the zinc-binding domain of the regulatory chains.* Proc Natl Acad Sci U S A, 1989. **86**(9): p. 3094-8.
19. Corder, T.S. and J.R. Wild, *Discrimination between nucleotide effector responses of aspartate transcarbamoylase due to a single site substitution in the allosteric binding site.* J Biol Chem, 1989. **264**(13): p. 7425-30.
20. Newton, C.J. and E.R. Kantrowitz, *Importance of domain closure for homotropic cooperativity in Escherichia coli aspartate transcarbamoylase.* Biochemistry, 1990. **29**(6): p. 1444-51.
21. Stebbins, J.W., Y. Zhang, and E.R. Kantrowitz, *Importance of residues Arg-167 and Gln-231 in both the allosteric and catalytic mechanisms of Escherichia coli aspartate transcarbamoylase.* Biochemistry, 1990. **29**(16): p. 3821-7.
22. Newell, J.O. and H.K. Schachman, *Amino acid substitutions which stabilize aspartate transcarbamoylase in the R state disrupt both homotropic and heterotropic effects.* Biophys Chem, 1990. **37**(1-3): p. 183-96.
23. Van Vliet, F., et al., *Heterotropic interactions in aspartate transcarbamoylase: turning allosteric ATP activation into inhibition as a consequence of a single tyrosine to phenylalanine mutation.* Proc Natl Acad Sci U S A, 1991. **88**(20): p. 9180-3.
24. Wenthe, S.R. and H.K. Schachman, *Different amino acid substitutions at the same position in the nucleotide-binding site of aspartate transcarbamoylase have diverse effects on the allosteric properties of the enzyme.* J Biol Chem, 1991. **266**(31): p. 20833-9.
25. Newton, C.J., R.C. Stevens, and E.R. Kantrowitz, *Importance of a conserved residue, aspartate-162, for the function of Escherichia coli aspartate transcarbamoylase.* Biochemistry, 1992. **31**(11): p. 3026-32.
26. Strang, C.J., et al., *Site-directed alterations to the geometry of the aspartate transcarbamoylase zinc domain: selective alteration to regulation by heterotropic ligands, isoelectric point, and stability in urea.* Biochemistry, 1993. **32**(16): p. 4156-67.
27. Xi, X.G., et al., *The activation of Escherichia coli aspartate transcarbamoylase by ATP. Specific involvement of helix H2' at the hydrophobic interface between the two domains of the regulatory chains.* J Mol Biol, 1994. **242**(2): p. 139-49.
28. De Staercke, C., et al., *Intramolecular transmission of the ATP regulatory signal in Escherichia coli aspartate transcarbamoylase: specific involvement of a clustered set of amino acid interactions at an interface between regulatory and catalytic subunits.* J Mol Biol, 1995. **246**(1): p. 132-43.

29. Baker, D.P., et al., *The allosteric activator ATP induces a substrate-dependent alteration of the quaternary structure of a mutant aspartate transcarbamoylase impaired in active site closure*. Protein Sci, 1996. **5**(11): p. 2276-86.
30. Dutta, M. and E.R. Kantrowitz, *The influence of the regulatory chain amino acids Glu-62 and Ile-12 on the heterotropic properties of Escherichia coli aspartate transcarbamoylase*. Biochemistry, 1998. **37**(24): p. 8653-8.
31. Rastogi, V.K., et al., *Role of allosteric: zinc interdomain region of the regulatory subunit in the allosteric regulation of aspartate transcarbamoylase from Escherichia coli*. Arch Biochem Biophys, 1998. **354**(2): p. 215-24.
32. Williams, M.K. and E.R. Kantrowitz, *Threonine 82 in the regulatory chain is important for nucleotide affinity and for the allosteric stabilization of Escherichia coli aspartate transcarbamoylase*. Biochim Biophys Acta, 1998. **1429**(1): p. 249-58.
33. Fetler, L., et al., *Replacement of Asp-162 by Ala prevents the cooperative transition by the substrates while enhancing the effect of the allosteric activator ATP on E. coli aspartate transcarbamoylase*. Protein Sci, 2002. **11**(5): p. 1074-81.
34. Chan, R.S., et al., *The role of intersubunit interactions for the stabilization of the T state of Escherichia coli aspartate transcarbamoylase*. J Biol Chem, 2002. **277**(51): p. 49755-60.

**Table III: Expected and actual occurrences of allostery-perturbing mutants in allosteric networks for three proteins**

For each mutant in each protein, expected is the number of monomers containing that residue, actual is the number of times that residue occurs in the allosteric network, and hit rate = actual / expected.

A: phosphofructokinase

| residue | occurrences |        | hit rate |
|---------|-------------|--------|----------|
|         | expected    | actual |          |
| E161    | 4           | 4      | 1.00     |
| R162    | 4           | 4      | 1.00     |
| G212    | 4           | 2      | 0.50     |
| R25     | 4           | 4      | 1.00     |
| D211    | 4           | 2      | 0.50     |
| R252    | 4           | 4      | 1.00     |
| total   | 24          | 20     | 0.83     |

B: fructose bisphosphatase

| residue | occurrences |        | hit rate |
|---------|-------------|--------|----------|
|         | expected    | actual |          |
| A24     | 4           | 4      | 1.00     |
| T31     | 4           | 4      | 1.00     |
| Y113    | 4           | 0      | 0.00     |
| R22     | 4           | 4      | 1.00     |
| T27     | 4           | 4      | 1.00     |
| M18     | 4           | 4      | 1.00     |
| K42     | 4           | 0      | 0.00     |
| E92     | 4           | 0      | 0.00     |
| K72     | 4           | 4      | 1.00     |
| R49     | 4           | 0      | 0.00     |
| A51     | 4           | 4      | 1.00     |
| K50     | 4           | 4      | 1.00     |
| K112    | 4           | 0      | 0.00     |
| total   | 52          | 32     | 0.62     |

C: aspartate transcarbamoylase

The mutants in the top block are catalytic chain residues; those in the bottom block are regulatory chain residues.

| residue | occurrences |        | hit rate |
|---------|-------------|--------|----------|
|         | expected    | actual |          |
| C-Q108  | 6           | 0      | 0.00     |
| E50     | 6           | 6      | 1.00     |
| Q231    | 6           | 6      | 1.00     |
| K164    | 6           | 6      | 1.00     |
| E239    | 6           | 6      | 1.00     |
| D160    | 6           | 0      | 0.00     |
| S171    | 6           | 4      | 0.67     |

|       |     |     |      |
|-------|-----|-----|------|
| D162  | 6   | 3   | 0.50 |
| D236  | 6   | 6   | 1.00 |
| R-K94 | 6   | 6   | 1.00 |
| N113  | 6   | 3   | 0.50 |
| N111  | 6   | 6   | 1.00 |
| K56   | 6   | 3   | 0.50 |
| Y77   | 6   | 6   | 1.00 |
| K60   | 6   | 6   | 1.00 |
| C109  | 6   | 0   | 0.00 |
| E119  | 6   | 0   | 0.00 |
| V106  | 6   | 6   | 1.00 |
| L76   | 6   | 6   | 1.00 |
| L151  | 6   | 3   | 0.50 |
| F145  | 6   | 6   | 1.00 |
| S146  | 6   | 3   | 0.50 |
| N148  | 6   | 3   | 0.50 |
| V149  | 6   | 6   | 1.00 |
| N153  | 6   | 6   | 1.00 |
| E162  | 6   | 0   | 0.00 |
| I12   | 6   | 3   | 0.50 |
| D104  | 6   | 3   | 0.50 |
| I103  | 6   | 3   | 0.50 |
| T82   | 6   | 6   | 1.00 |
| total | 180 | 121 | 0.67 |



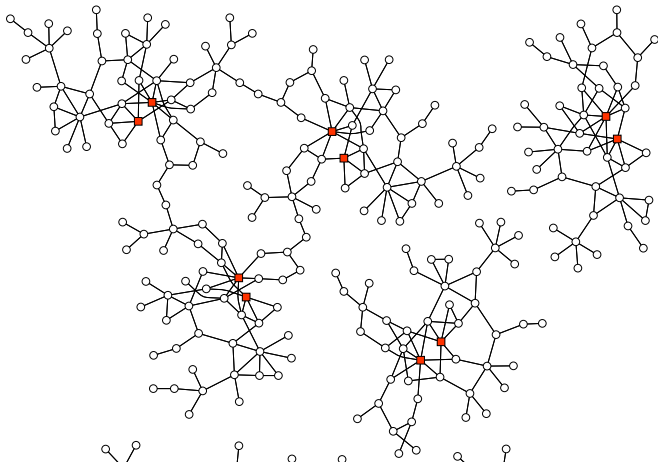

glucosamine-6-P deaminase

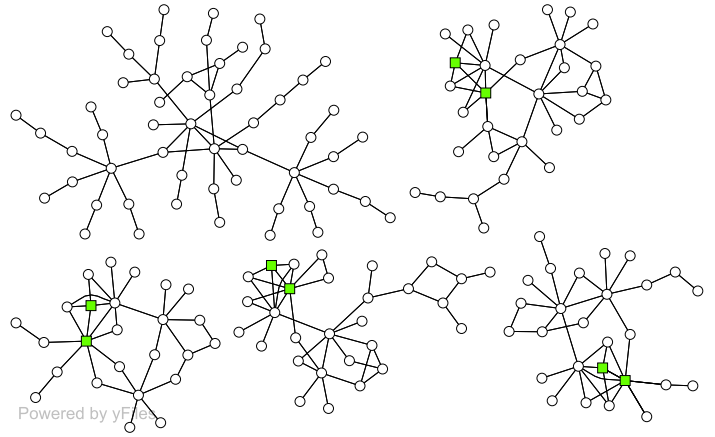

DAHP synthase

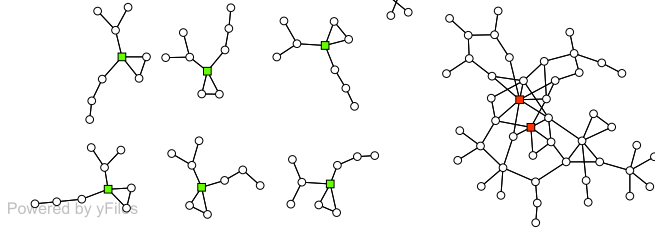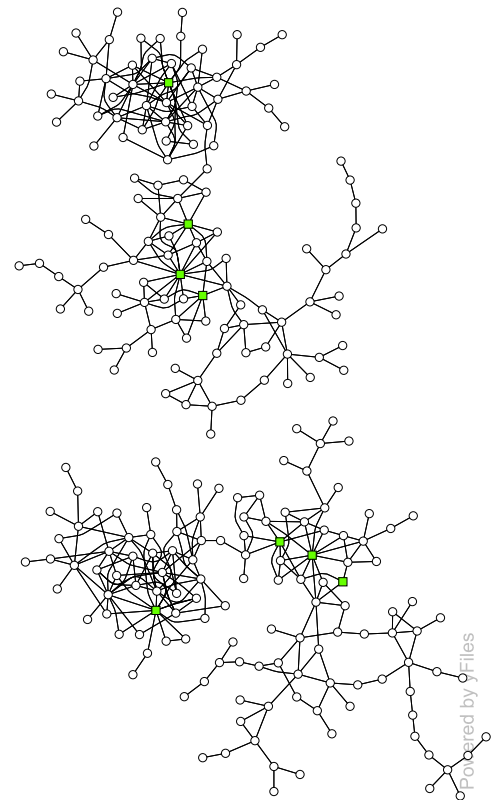

anthranilate synthase

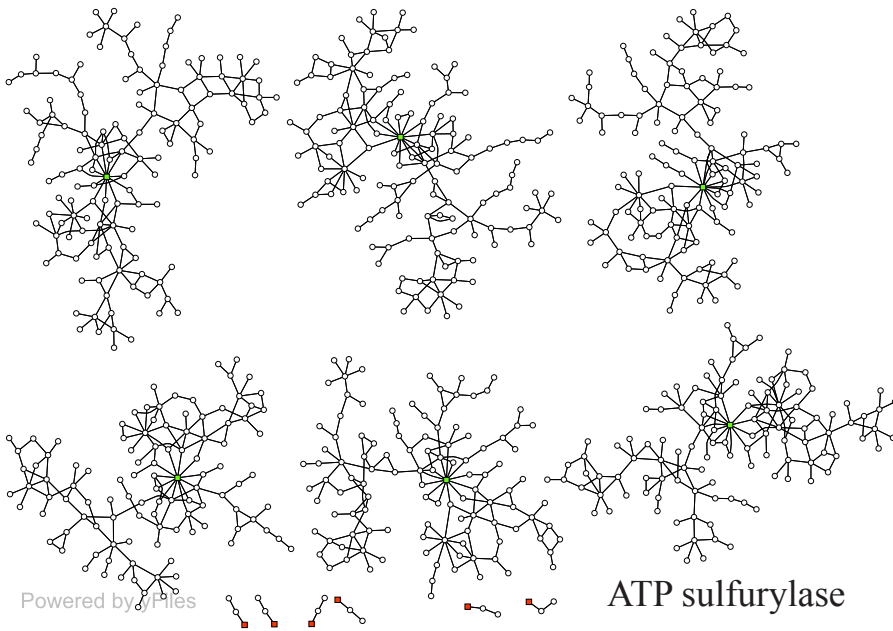

ATP sulfurylase

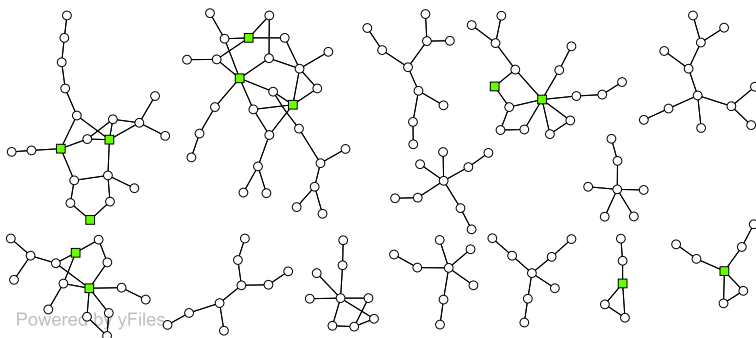

phosphoglycerate dehydrogenase

**Figure 1: Additional contact rearrangement networks**  
Formatted as in Figure 2 of the main text. Continued on next page.

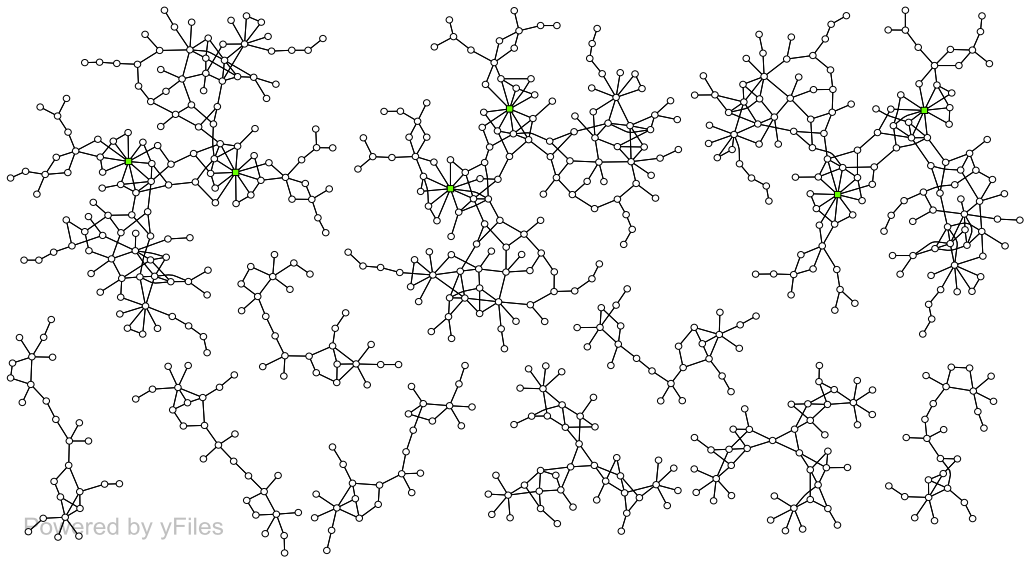

ATP-phosphoribosyltransferase

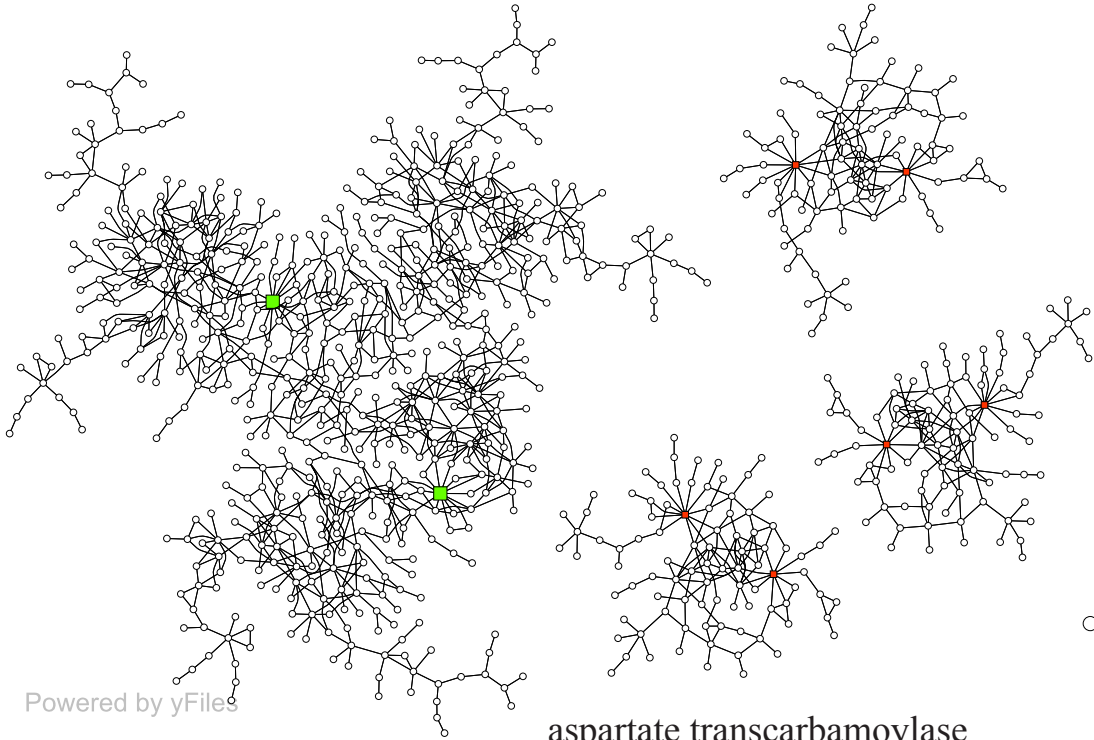

aspartate transcarbamoylase

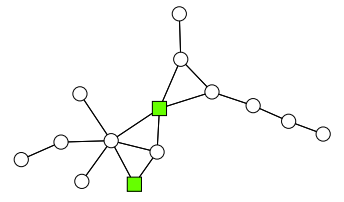

PTP1B

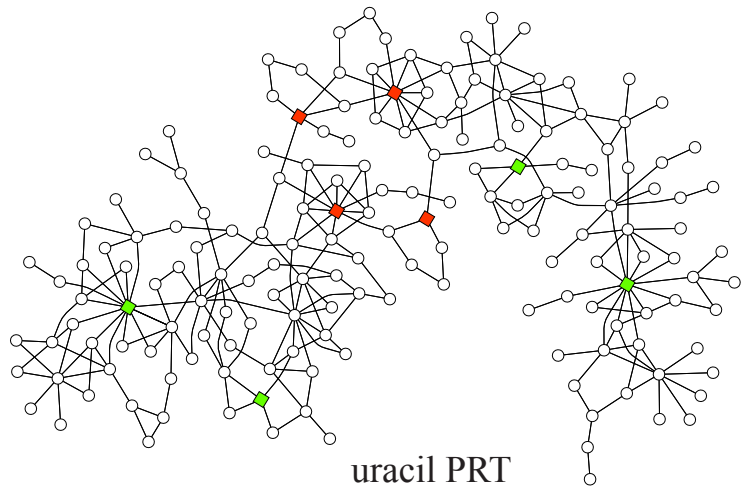

uracil PRT

Figure 1 (cont)

Figure 2: Allostery-perturbing mutants and closest residues in two clusters of ATCase

A

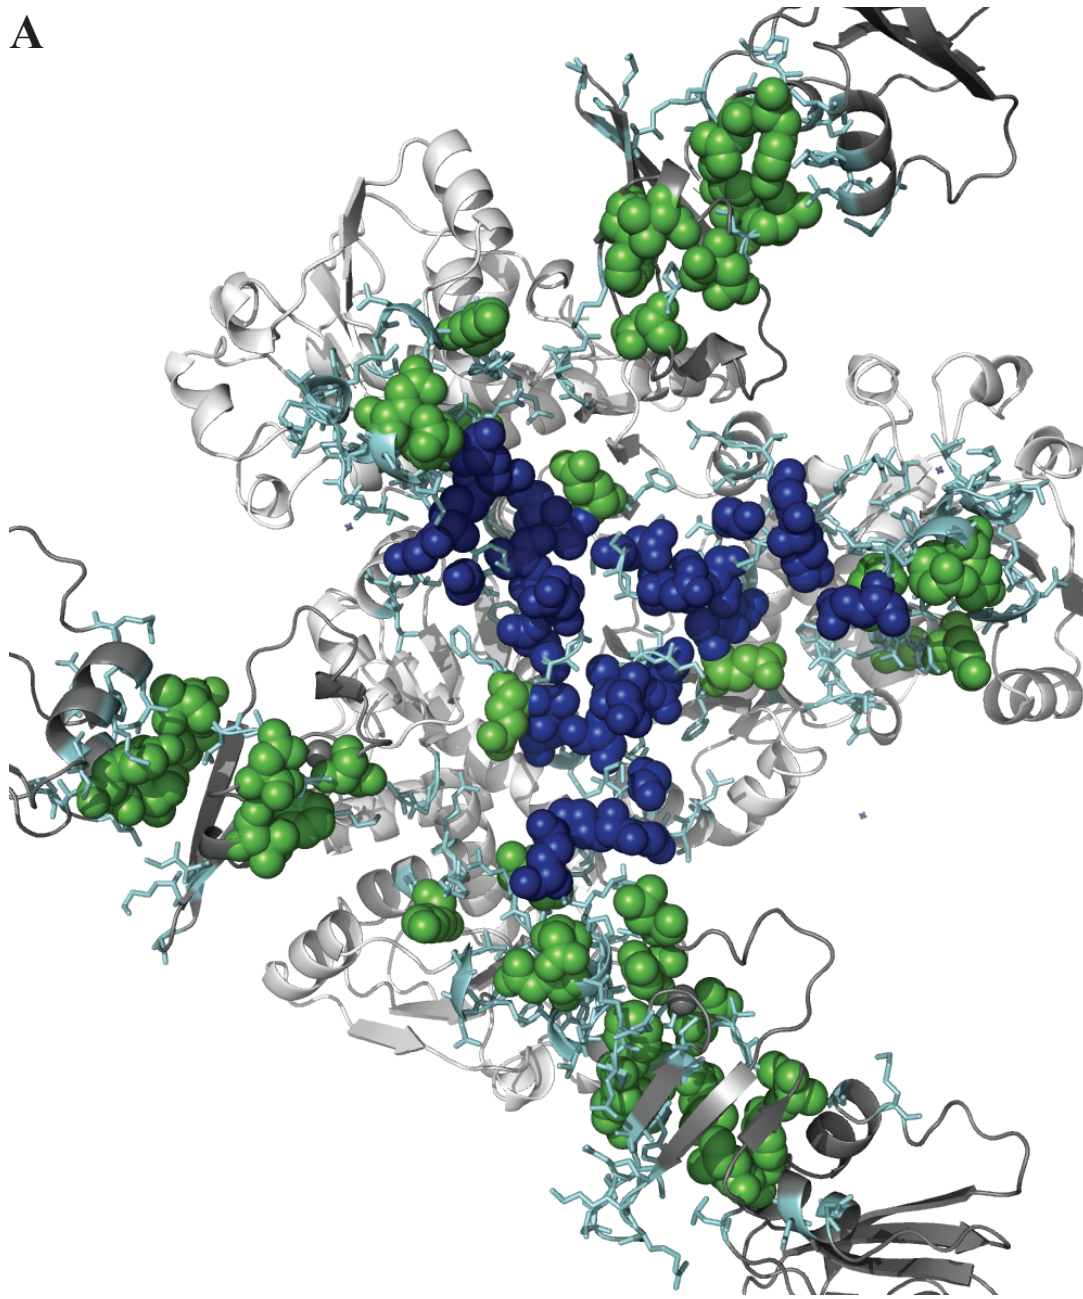

A: One half of ATCase (1RAC.pdb, I structure), including one catalytic trimer (white) and parts of one monomer from each of the regulatory dimers (gray). Cyan: residues in cluster 1; green: allostery-perturbing mutants in cluster 1; blue: closest residues in cluster 1 (10 per catalytic subunit). The allostery-perturbing mutants and the closest residues do not overlap.

B

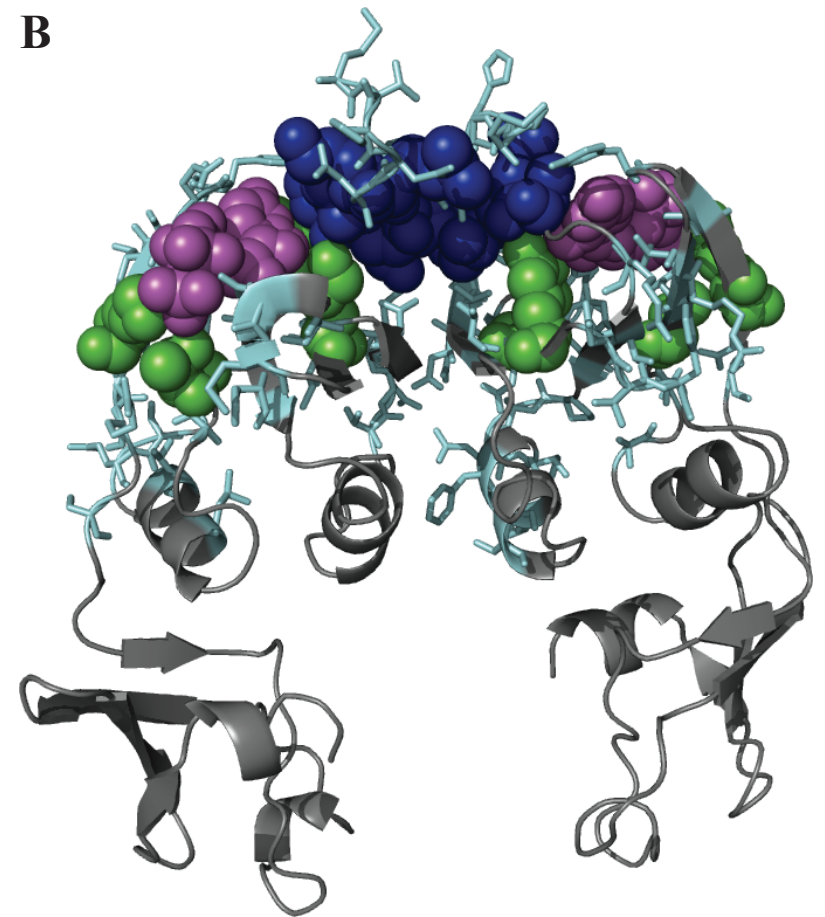

B: one regulatory dimer from ATCase. Cyan: residues in cluster 2; green: allostery-perturbing mutants in cluster 2; blue: closest residues in cluster 2 (5 per regulatory subunit); purple: inhibitor (CTP) molecules. The allostery-perturbing mutants and the closest residues do not overlap.

**Continued on next page**

Figure 2A shows that cluster 1 is located in the catalytic trimers and in the C-terminal domains of the regulatory subunits. Most known allostery-perturbing mutants are located near the substrate-binding sites (not shown) near the centers of the catalytic chains or at the interfaces between the two domains of the regulatory chains at the periphery of this large cluster. On the other hand, the 60 residues with highest closeness in this cluster (10 per subunit) lie near the central axis of the catalytic trimer in the region where the two catalytic trimers interact, which is close to the substrate-binding site but far from the regulatory chain. Thus, while closeness fails to illuminate the regions of this cluster where it is most natural to expect that there would be residues important to allostery, it may well have identified a new, previously untested region as being important to allostery in this protein. This central region might mediate communication among the catalytic subunits. ATCase clusters 2-4, which are respectively located in the three regulatory dimers in the N-terminal domain of each subunit, show similar situations (Figure 2B). In cluster 2, most known allostery-perturbing mutations surround the effector binding sites, while the 10 residues with highest closeness (5 per subunit) lie at the dimer interface, a region which might be important for communication within the dimer.

**Figure 3: CRN residues vs. SCA residues for two proteins**

**phosphofructokinase**

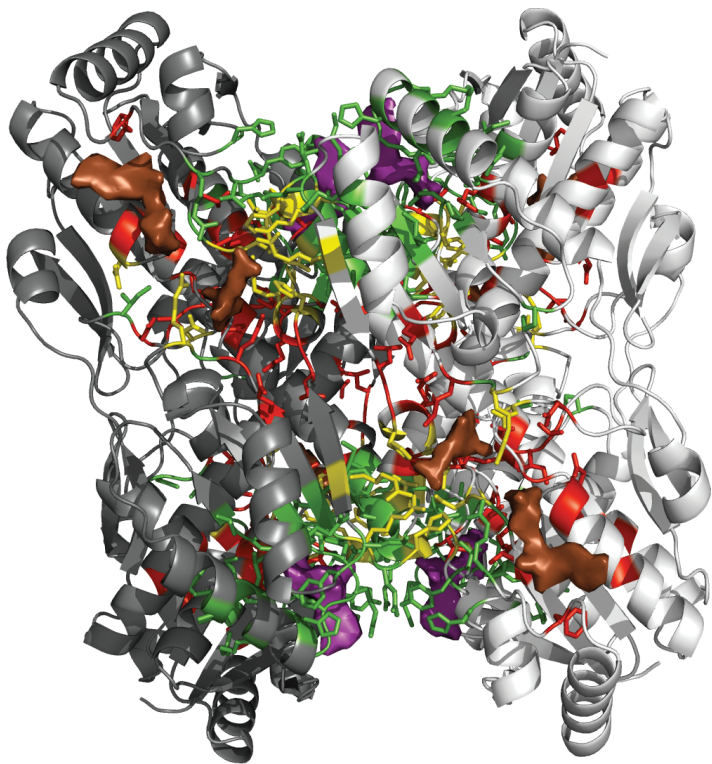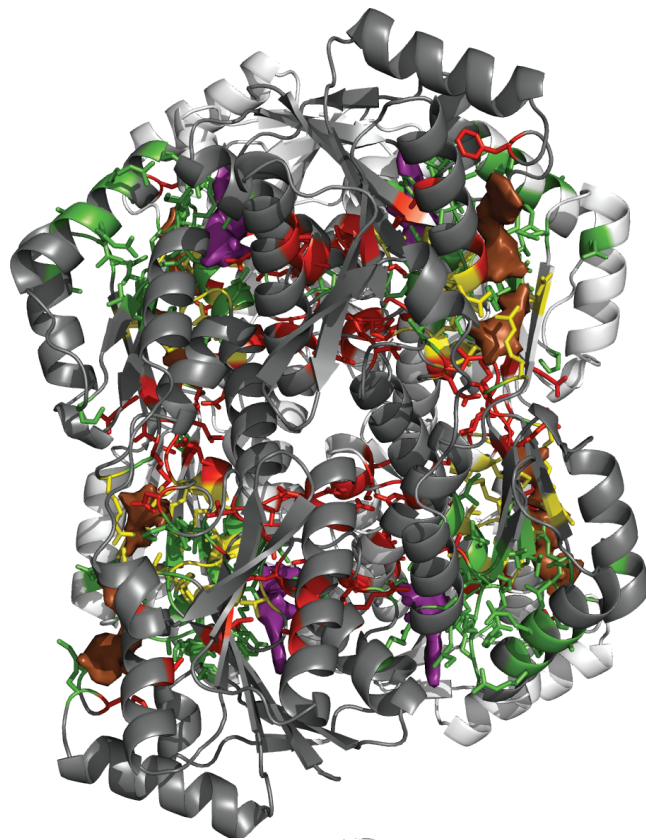

**fructose biphosphatase**

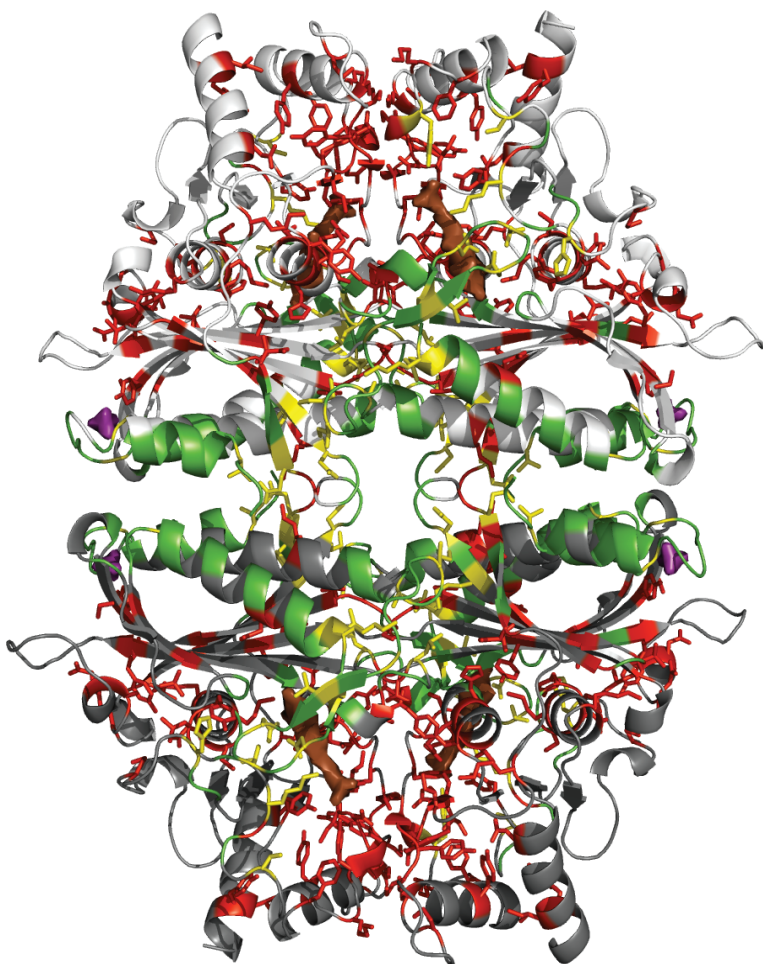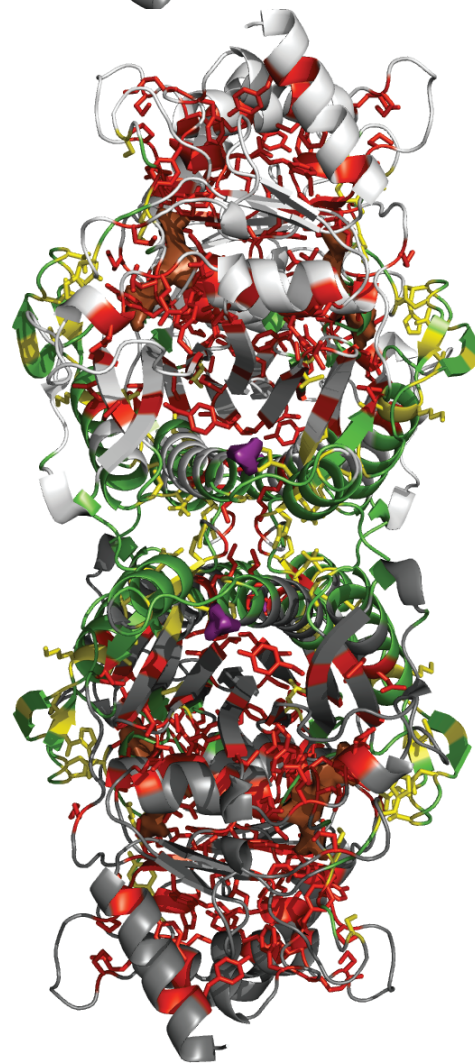

4PFK is shown for PFK and 1EYI is shown for FBPase. Views in the right column are rotated 90° about the y axis relative to the views in the left column. Red: statistically coupled (SCA) residues according to the algorithm of Suel et al. (2003); green: contact rearrangement network (CRN) residues; yellow: residues identified by both methods; purple: effector molecules; brown: substrate molecules.

# A

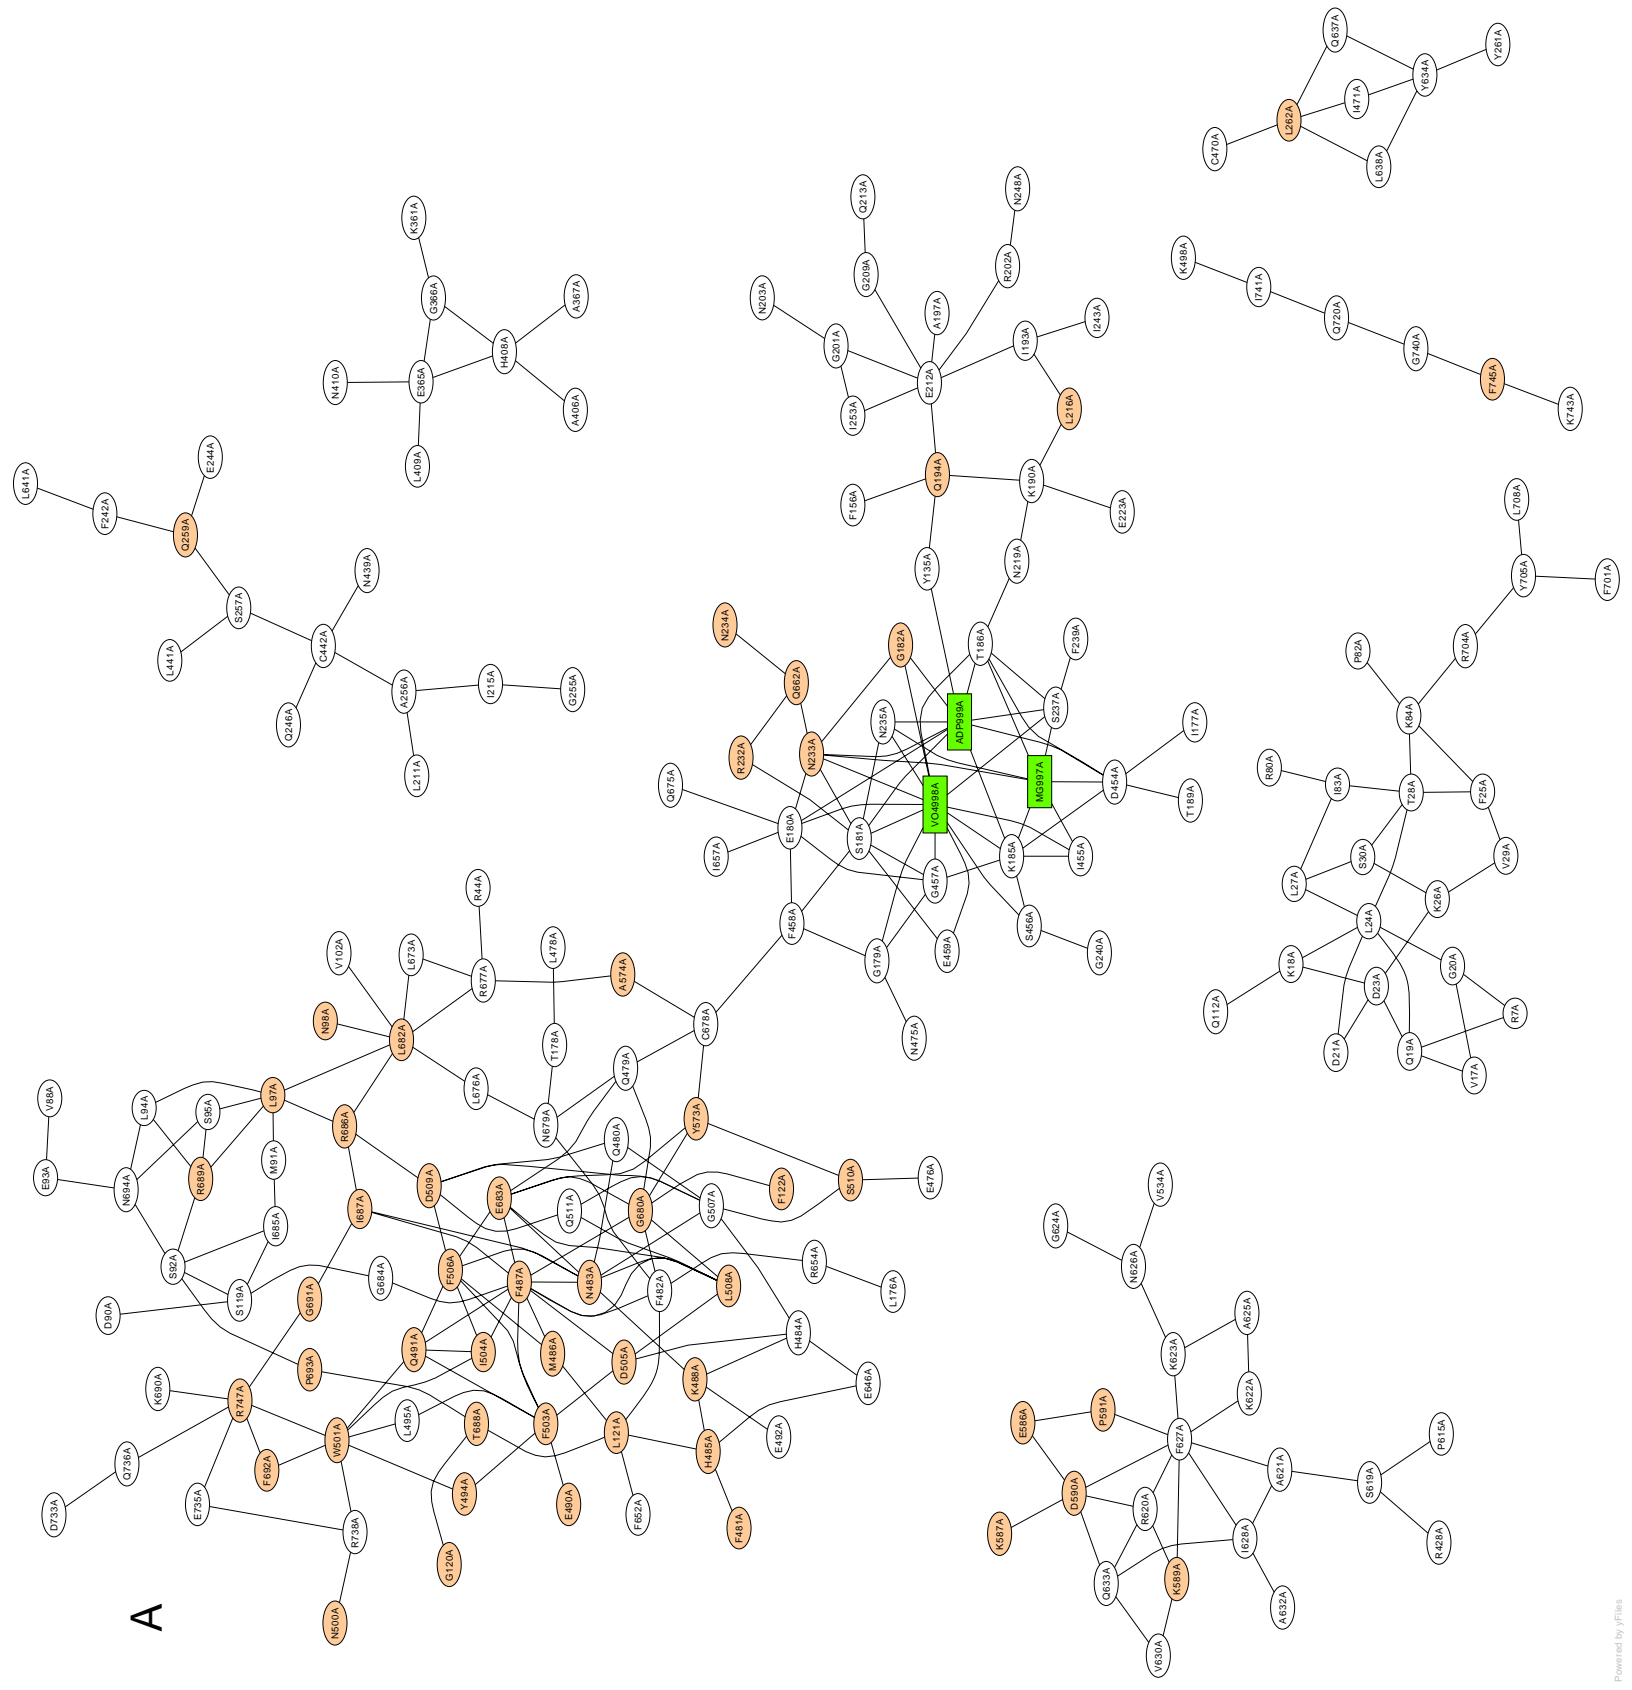

B

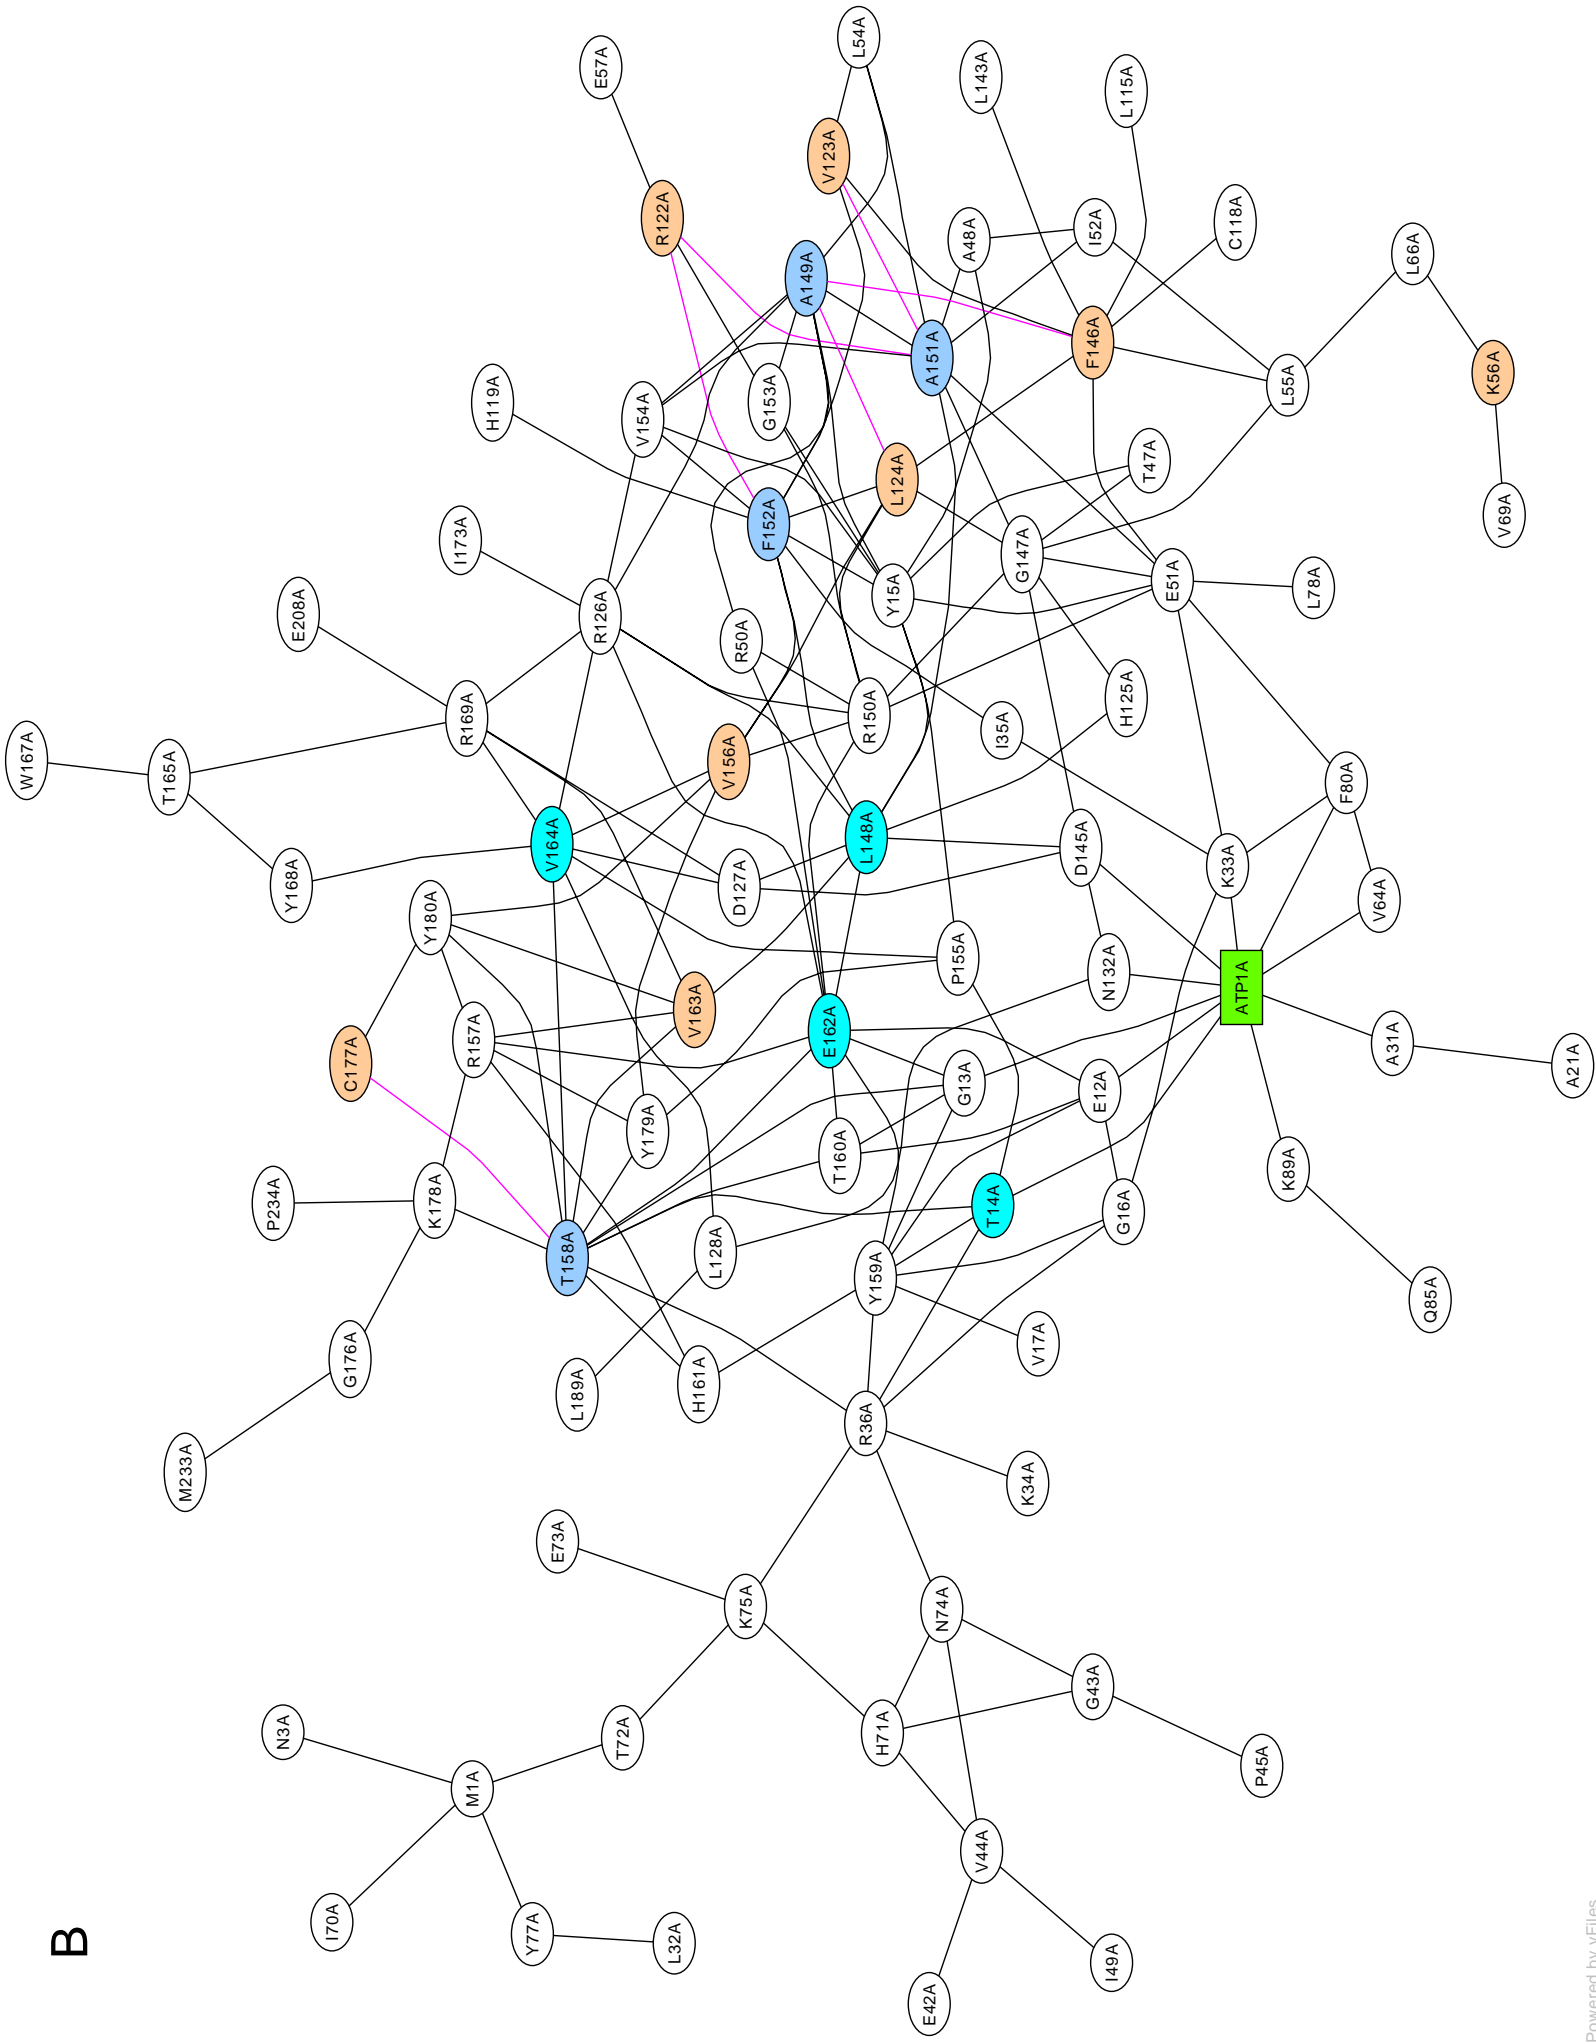

**Figure 4: Comparison of contact rearrangement network results to two normal mode analysis-based studies**

Graphs are formatted as in figure 4 of main text.

A: Comparison of CRN for myosin (1Q5G vs. 1VOM) to the top 10% dynamically correlated residues of the structure 1VOM as calculated by Zheng and Brooks (2005). Salmon: top 10 % dynamically correlated residues captured by top 7 clusters.

B: Comparison of CRN for cyclin A binding transition (1HCK vs. 1FIN) to PIVET analysis by Gu & Bourne (2007). Salmon and light blue: residues in the 10 pairs with the greatest influence on global fluctuation according to PIVET which also appear in the network. Light blue: CRN key residues (in the top 5 by degree or closeness) which are also in the top 10 PIVET pairs. Cyan: remaining CRN key residues. Magenta: top 10 PIVET interactions captured by the CRN.
